# Supplementary material
Source: PubMed Central journal article supplement (PMC10350345)

A *MYCN*-WT/p53-WT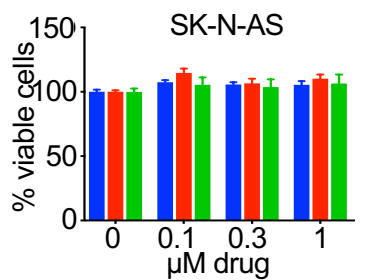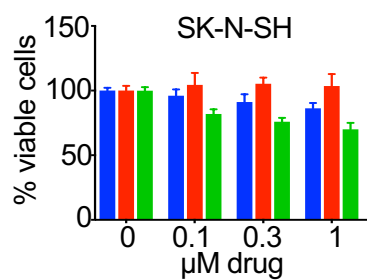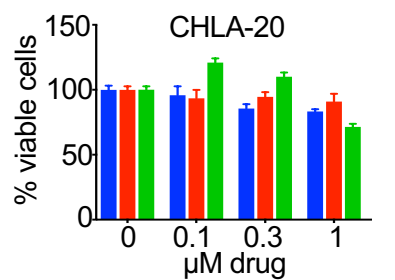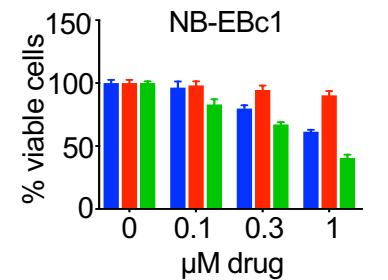B *MYCN*-amp/p53-mut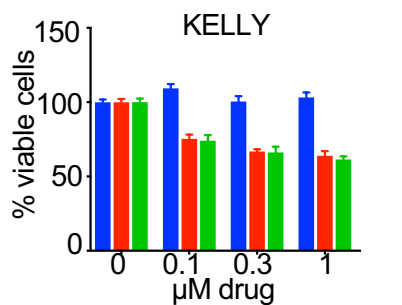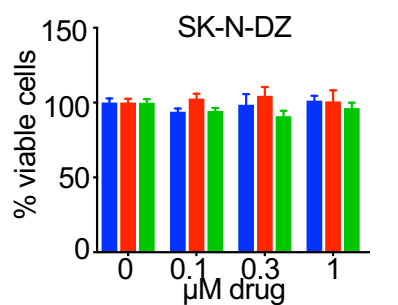

■ NVP-CGM097  
■ Venetoclax  
■ NVP/Ven

C *MYCN*-WT/p53-mut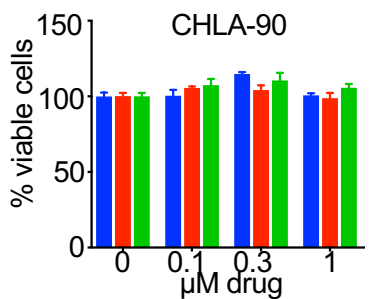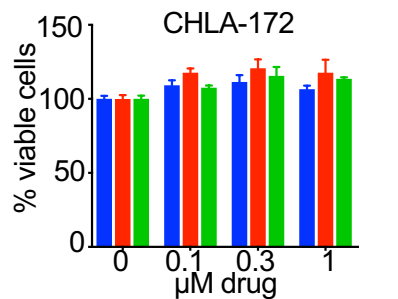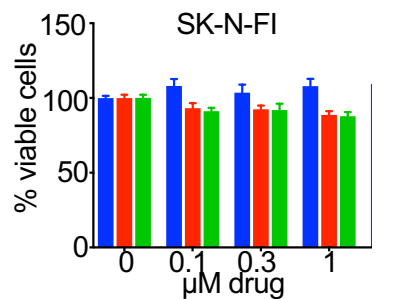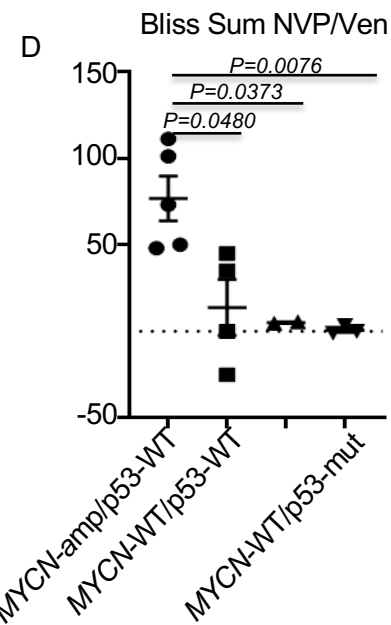

A

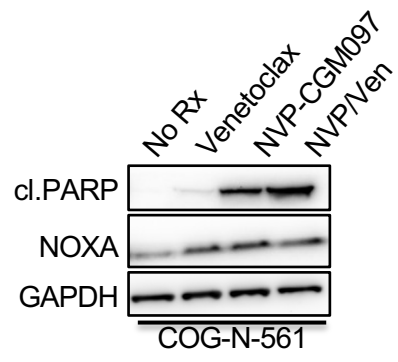

# Supplemental Figure 3

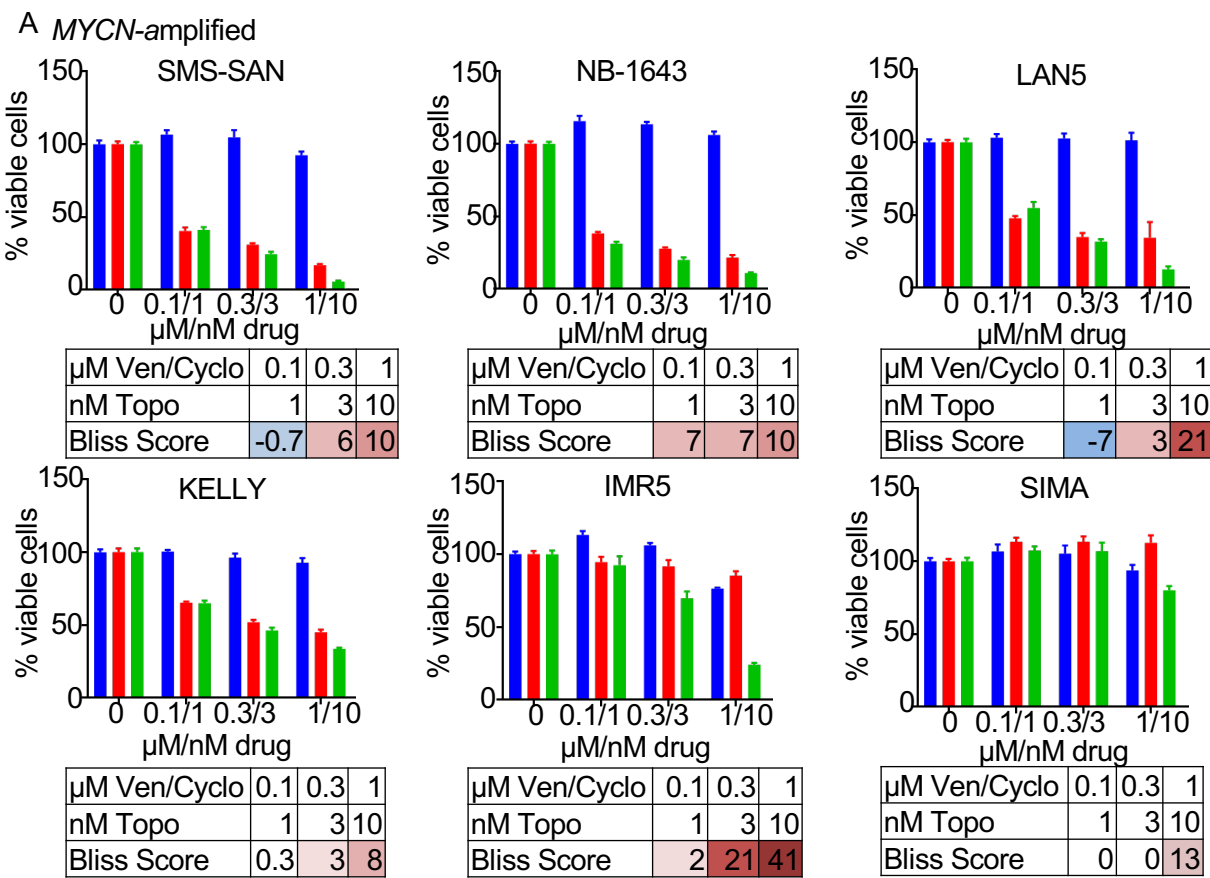

■ Cyclo/Topo  
■ Venetoclax  
■ Cyclo/Topo/Ven

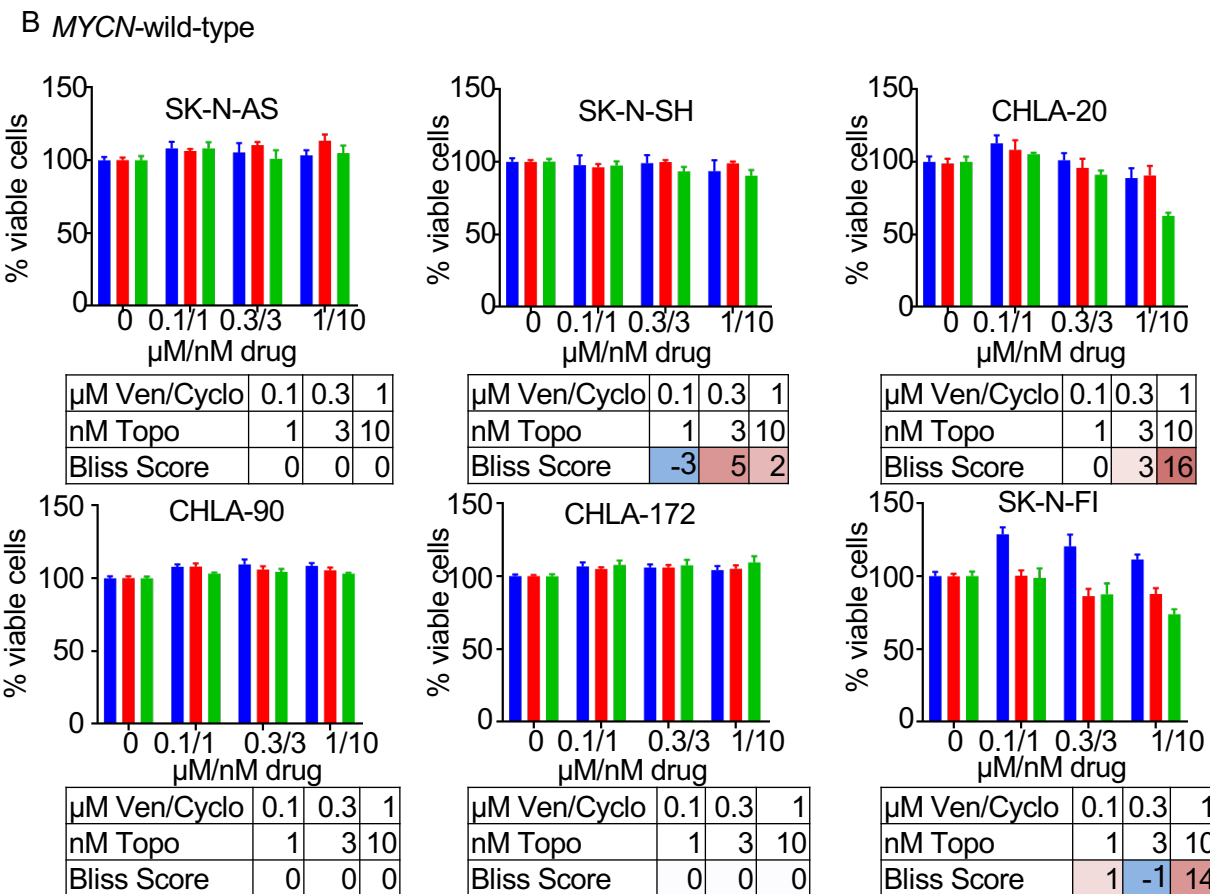

■ Cyclo/Topo  
■ Venetoclax  
■ Cyclo/Topo/Ven

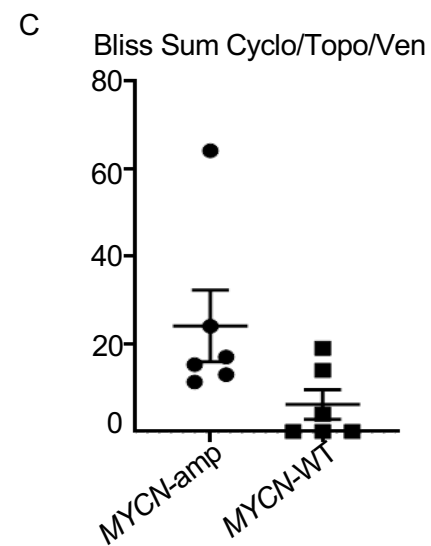

A

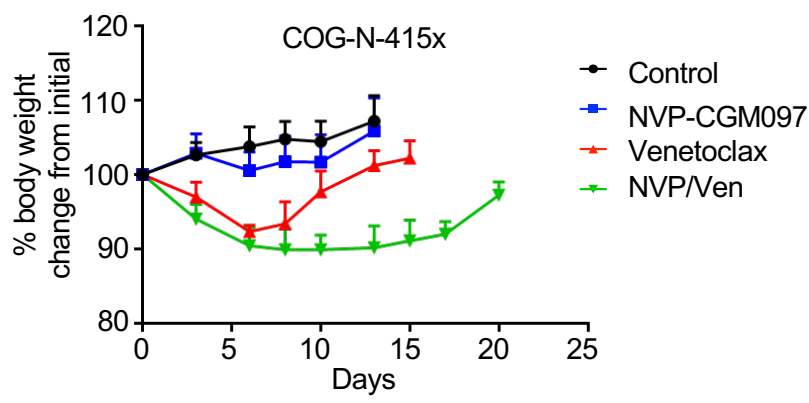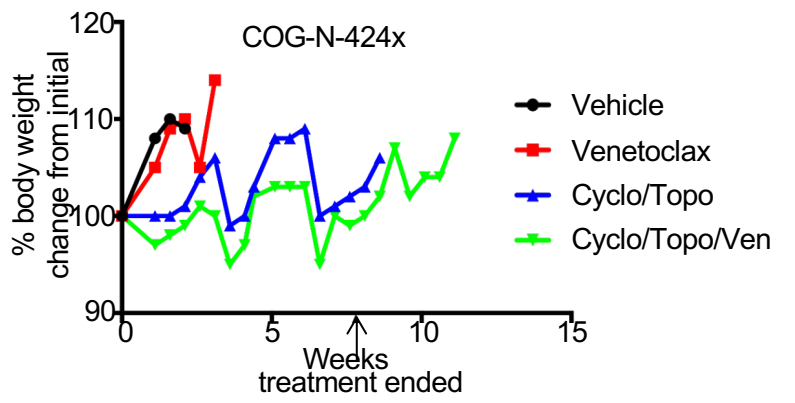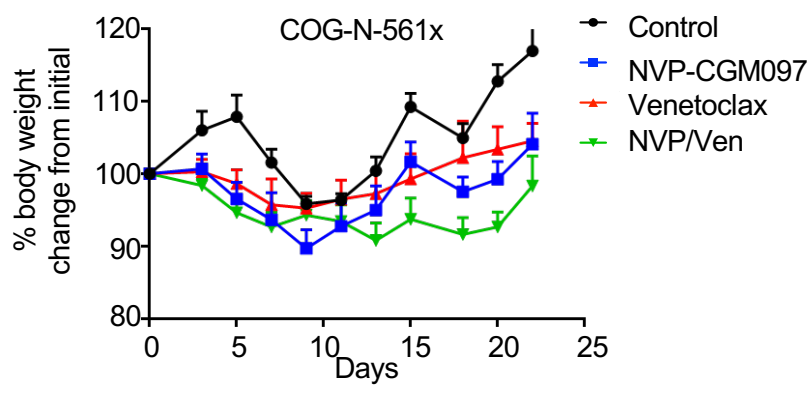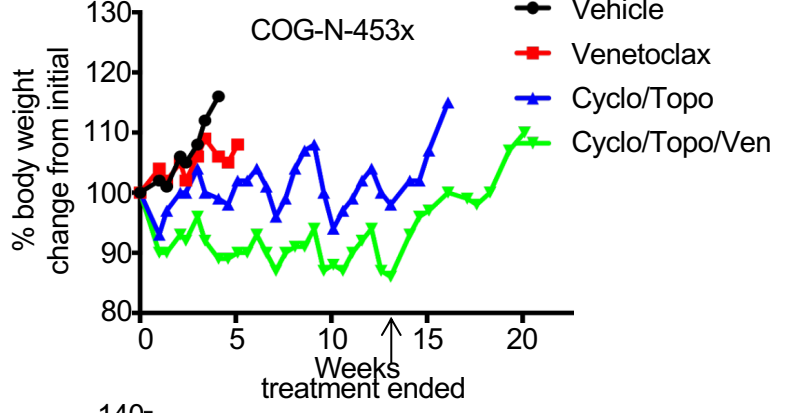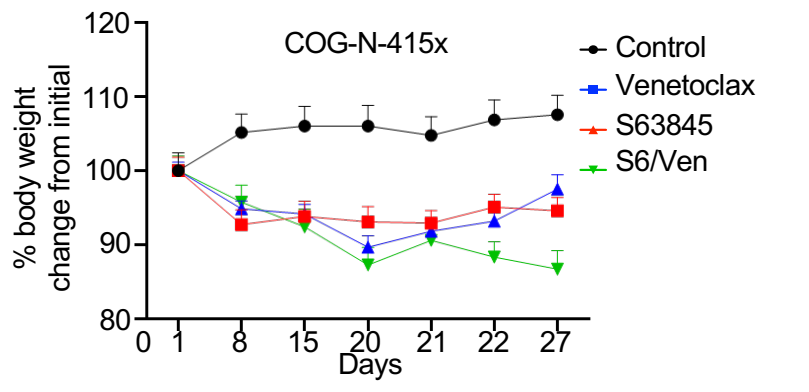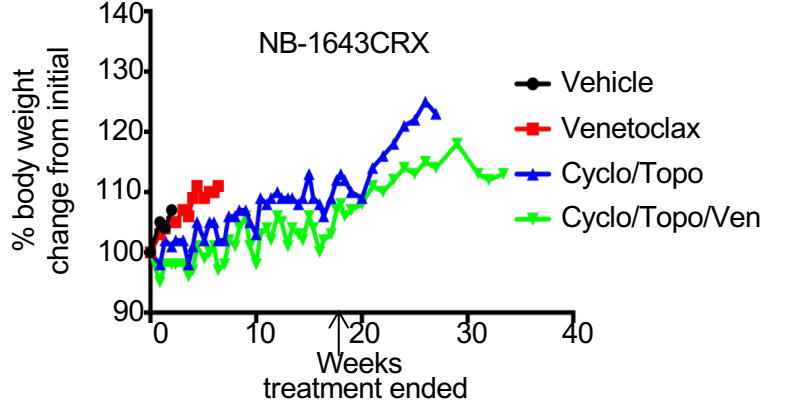

Supplement: NIHMS1913234-supplement-Sup__Figures.pdf [file NIHMS1913234-supplement-Sup__Figures.pdf]
