# Supplementary material
Source: PubMed Central journal article supplement (PMC10350345)
Supplement: NIHMS1913234-supplement-Sup__Figure_legends.pdf [file NIHMS1913234-supplement-Sup__Figure_legends.pdf]

## Supplemental Data

**Supplemental Figure 1. NVP-CGM097 and venetoclax combination cell viability assays.** Cell viability assays were performed for 16h treatment of NVP-CGM097, venetoclax, or combination at indicated concentrations, with bliss synergy scores in (A) *MYCN*-wild-type, p53-wild-type, (B) *MYCN*-amplified, p53-mutant, and (C) *MYCN*-wild-type, p53-mutant NB cell lines. Red indicates synergy, blue indicates antagonism. (D) Plot of Bliss sum of cell lines in A-C along with cell lines in Fig. 1B, calculated by the summation of the bliss synergy scores across the doses presented.

**Supplemental Figure 2. PDX ex vivo model demonstrated cleavage of PARP with corresponding NOXA upregulation** (A) Western blot of COG-N-561 *ex vivo* cell line treated overnight with antibodies as indicated.

**Supplemental Figure 3. Chemotherapy and venetoclax combination cell viability assays.** Cell viability assays were performed for 72h treatment of cyclophosphamide and topotecan, venetoclax, or combination at indicated concentrations, with bliss synergy scores in (A) *MYCN*-amplified, and (B) *MYCN*-wild-type cell lines. (C) Plot of Bliss sum of cell lines in A-B, calculated by the summation of the bliss synergy scores across the doses presented.

**Supplemental Figure 4. Body Weight of Mice for *in vivo* treatments.** (A) Plot of percent change in body weight from pre-treatment body weight in all *in-vivo* treatments.
